# Supplementary material for: DNA methylation signal has a major role in the response of human breast cancer cells to the microenvironment
Source: PubMed Central journal article supplement (PMC5668886; doi:10.1038/oncsis.2017.88), 2017-10-23
Supplement: oncsis201788x2.pdf [file oncsis201788x2.pdf]

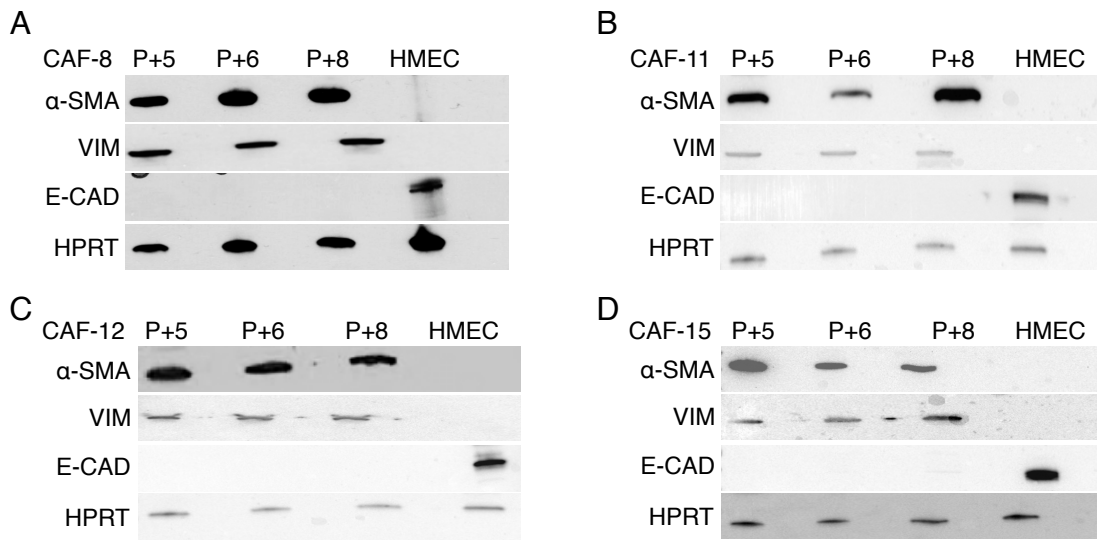

Supplementary Figure S1.

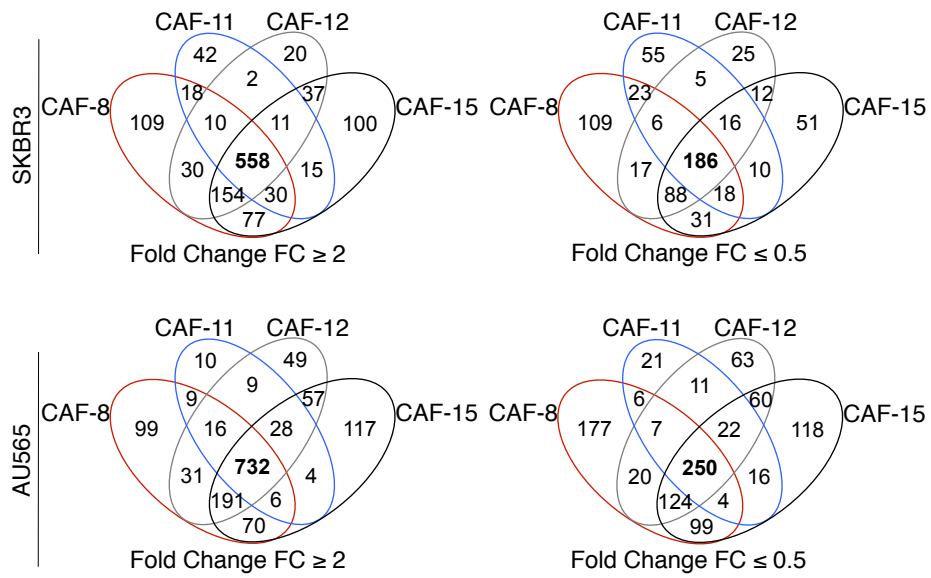

Supplementary Figure S2.

A

Genes upregulated by CAF-CMs

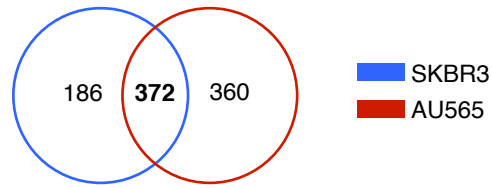

B

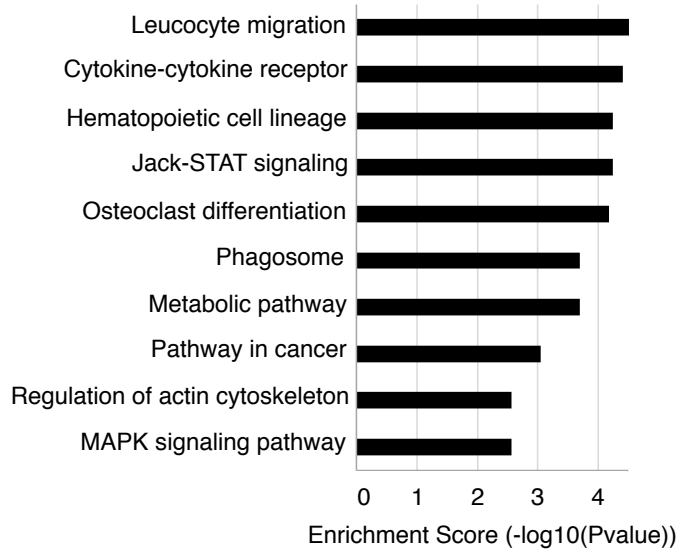

Supplementary Figure S3.

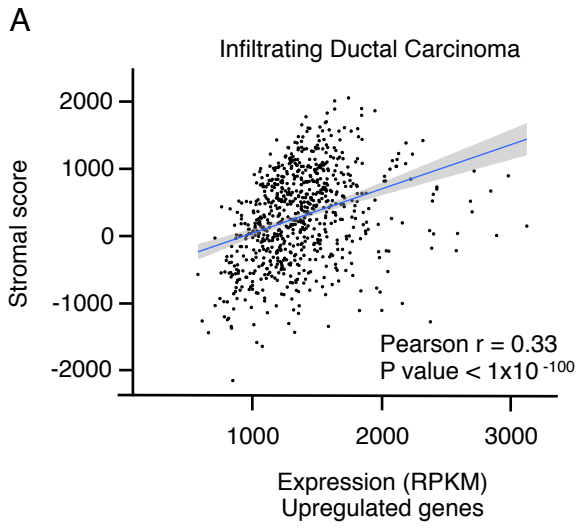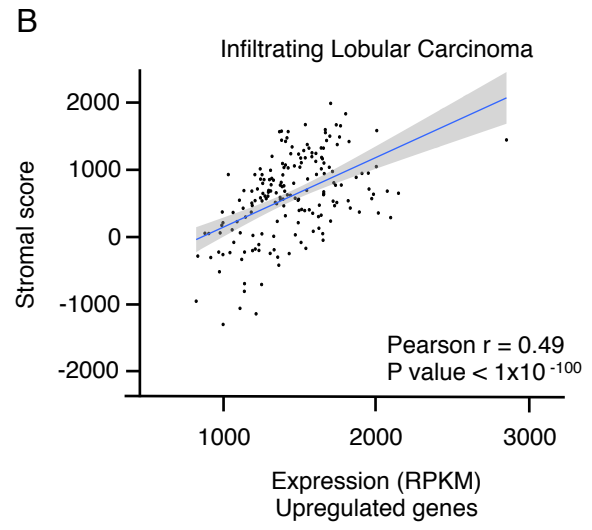

Supplementary Figure S4.

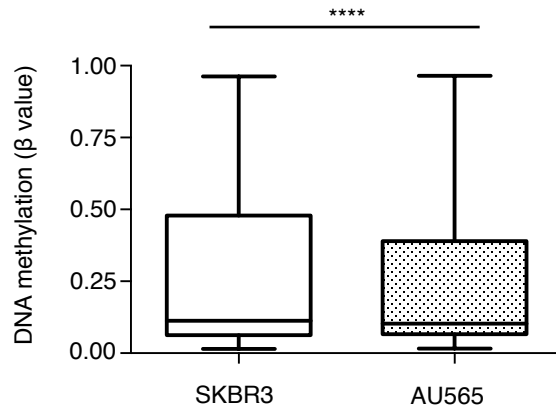

Supplementary Figure S5.

A

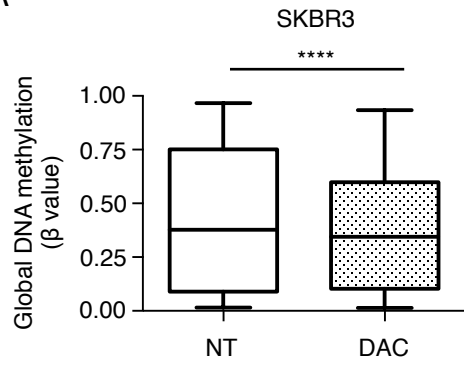

B

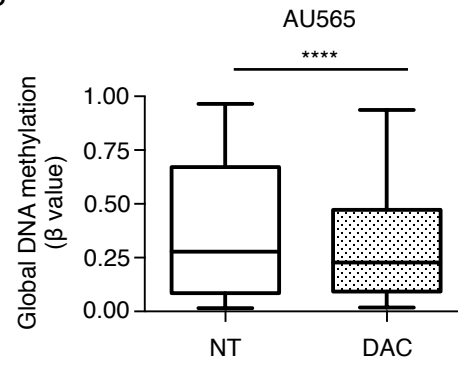

Supplementary Figure S6.

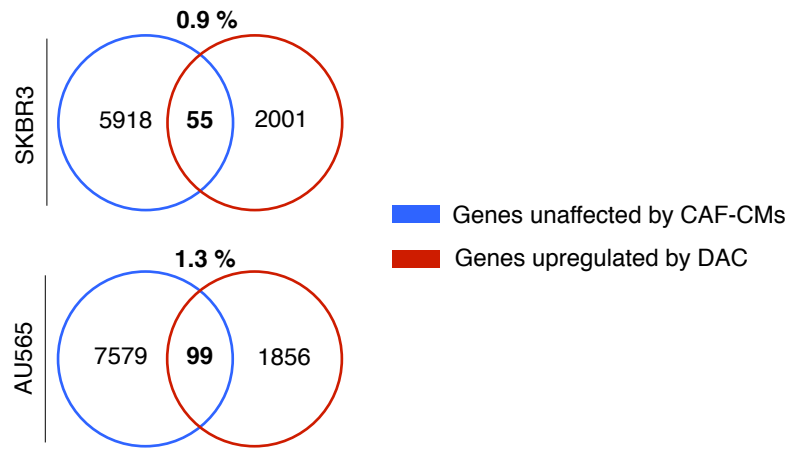

Supplementary Figure S7.
