# Supplementary material for: DNA methylation signal has a major role in the response of human breast cancer cells to the microenvironment
Source: PubMed Central journal article supplement (PMC5668886; doi:10.1038/oncsis.2017.88), 2017-10-23
Supplement: oncsis201788x3.pdf [file oncsis201788x3.pdf]

---

| <b>CAF</b> | <b>Date</b> | <b>Histological_Type</b>          | <b>Grade</b> | <b>Detail_Grade</b> | <b>ER Status</b> | <b>PR Status</b> | <b>HER2 Status</b> |
|------------|-------------|-----------------------------------|--------------|---------------------|------------------|------------------|--------------------|
| <b>8</b>   | 01/10/13    | Infiltrating Ductal<br>Carcinoma  | III          | 3-3-2               | ER +             | PR +             | HER2 -             |
| <b>11</b>  | 19/02/14    | Infiltrating Ductal<br>Carcinoma  | II           | 3-3-1               | ER +             | PR +             | HER2 -             |
| <b>12</b>  | 01/11/14    | Infiltrating Lobular<br>Carcinoma | II           | 3-2-1               | ER +             | PR +             | HER2 +             |
| <b>15</b>  | 20/05/14    | Infiltrating Ductal<br>Carcinoma  | I            | 2-2-1               | ER +             | PR +             | HER2 -             |

---

Supplementary Table S1.

**A**

| SKBR3            |        |        |        |
|------------------|--------|--------|--------|
| <b>Pearson r</b> | CAF-11 | CAF-12 | CAF-15 |
| CAF-8            | 0.929  | 0.978  | 0.970  |
| CAF-11           |        | 0.977  | 0.960  |
| CAF-12           |        |        | 0.992  |

**B**

| AU565            |        |        |        |
|------------------|--------|--------|--------|
| <b>Pearson r</b> | CAF-11 | CAF-12 | CAF-15 |
| CAF-8            | 0.942  | 1      | 0.990  |
| CAF-11           |        | 0.942  | 0.902  |
| CAF-12           |        |        | 0.989  |

Supplementary Table S2.

A

## SKBR3

| Gene         | Value in cells treated with siScramble | Value in cells treated with siMBD2 | Fold change | q-value | Significant |
|--------------|----------------------------------------|------------------------------------|-------------|---------|-------------|
| <i>MBD2</i>  | 12.2                                   | 1.6                                | 0.1         | 0.0021  | yes         |
| <i>MECP2</i> | 11.9                                   | 10.3                               | 0.9         | 0.7721  | no          |
| <i>MBD1</i>  | 14.4                                   | 13.8                               | 1.0         | 0.9361  | no          |
| <i>MBD3</i>  | 21.9                                   | 22.1                               | 1.0         | 0.9895  | no          |
| <i>MBD4</i>  | 14.7                                   | 13.6                               | 0.9         | 0.8812  | no          |

B

## AU565

| Gene         | Value in cells treated with siScramble | Value in cells treated with siMBD2 | Fold change | q-value | Significant |
|--------------|----------------------------------------|------------------------------------|-------------|---------|-------------|
| <i>MBD2</i>  | 14.0                                   | 1.8                                | 0.1         | 0.0013  | Yes         |
| <i>MECP2</i> | 13.4                                   | 11.8                               | 0.9         | 0.7832  | no          |
| <i>MBD1</i>  | 14.8                                   | 14.8                               | 1.0         | 0.9990  | no          |
| <i>MBD3</i>  | 9.4                                    | 11.8                               | 1.3         | 0.1893  | no          |
| <i>MBD4</i>  | 15.3                                   | 14.7                               | 1.0         | 0.9453  | no          |

Supplementary Table S3.

| <b>qPCR Primers</b>      | <b>Forward primer (5' to 3')</b> | <b>Reverse primer (5' to 3')</b> |
|--------------------------|----------------------------------|----------------------------------|
| <i>ITGB6</i>             | ATC-GGT-CTG-CAC-AGC-AAG-AA       | CAG-GCA-CAC-TGA-GGT-CCA-AT       |
| <i>FHL2</i>              | CTC-ATC-CAA-GTG-CCA-GGA-AT       | GTG-GCA-GAT-GAA-GCA-GGT-CT       |
| <i>STAT5A</i>            | CCC-CCA-GGC-TCC-CTA-TAA-CA       | AGA-GGT-GAA-AAG-ACC-GGC-AG       |
| <i>MUC20</i>             | AAG-ACC-TCA-CTG-ACC-CCA-GA       | ACC-TCT-CAG-CAC-AGT-AAC-GC       |
| <i>SERPINA3</i>          | CTT-CTC-CAG-CTG-GGC-ATT-GA       | GGC-CTG-TTG-AAA-CGC-ACA-AT       |
| <i>SAA1</i>              | ATG-ATG-CTG-CCA-AAA-GGG-GA       | CCA-CTC-CTG-CCC-CAT-TCA-TT       |
| <i>MBD2</i>              | TCA-GAA-GCA-AGC-CTC-AGT-TG       | CAG-AGC-TTG-TGT-GCA-AAG-CA       |
| <i>GAPDH</i>             | CGG-AGT-CAA-CGG-ATT-TGG-TCG-TAT  | AGC-CTT-CTC-CAT-GGT-GGT-GAA-GAC  |
| <i>PBGD</i>              | GAG-TGA-TTC-GCG-TGG-GTA-CC       | GGC-TCC-GAT-GGT-GAA-GCC          |
| <b>ChIP qPCR Primers</b> |                                  |                                  |
| <i>ITGβ6</i>             | GAG-TTA-GCA-AGC-TCC-TGG-CA       | CTC-CCG-GCT-TTC-CAA-AGA-GA       |
| <i>SERPINA3</i>          | GGA-GGA-GGG-ACA-ACC-ACT-TG       | CAC-CTA-GAG-AGG-GGT-GTG-GA       |
| <i>STAT5A</i>            | CTG-AAG-GGA-ACT-GCT-GGA-GG       | AAT-GGA-TTT-GGC-AGG-GGA-GG       |
| <i>PARP14</i>            | GAG-CAC-CTA-TTG-CCC-ACT-GT       | TCA-CAA-ACT-GTG-GCC-CCT-TT       |
| <i>UCA1</i>              | TCA-CTG-TGT-GAG-GGT-TTC-GG       | TCA-GGA-CTT-GGC-AAC-ACC-AA       |
| <i>NTN4</i>              | CTC-GGC-TAA-ACA-ATC-GCT-GC       | TTA-GCT-GCG-TGT-GGT-TGC-TA       |
| <i>SAA1</i>              | GGT-GGT-AAC-TCC-TGC-CTT-CC       | CCC-GTG-AGA-AGC-TTC-ATG-GT       |
| <i>ETV7</i>              | ACC-TAG-AAA-ACC-GGC-GAG-TG       | CAC-TCA-CTT-CCC-CTT-CCA-CC       |
| <i>PLA2G4F</i>           | GCC-TTA-GGC-TGC-AGA-TGG-AT       | TAG-GCC-TTG-GGA-AGA-GTG-GA       |
| <i>FHL2</i>              | GGA-AGG-TCC-TAT-CCC-CAC-CT       | CTC-AAC-CTG-TGC-TCT-CCC-TG       |
| <i>KSR1</i>              | GCA-CCA-ACT-CAG-CAA-ACA-GG       | TTA-CCA-CGG-TGA-AGG-CTG-AC       |
| <i>DAB2</i>              | TCG-GGG-AGA-AGT-CAA-AAG-CC       | AGG-AAC-CGT-TGT-CCC-TTG-TC       |
| <i>STAT3</i>             | TCT-TAC-CAC-GCG-GGA-ATC-AG       | ATG-TTT-CCG-GGT-GTG-TGT-GT       |
| <i>CDKN2B</i>            | TCG-CGA-AGC-AAG-TTG-ACT-GA       | GGG-AGA-AAA-GGG-GCT-TTG-GA       |
| <i>ELK3</i>              | ACC-GAA-AAC-CCA-GAC-AGG-AA       | GCT-GGG-ATG-GAA-GAG-TTG-GG       |
| <i>PDK4</i>              | GGG-GCT-GCC-CAG-ATA-CAT-TT       | GAC-CTT-TTG-CAG-CAG-ACA-GC       |
| <i>PARP10</i>            | CCC-CTC-ACT-CAG-GAT-CTC-CA       | CAG-GAC-AGA-AAG-CTG-CAG-GA       |
| Pos-Ctrl                 | AAG-GGC-TCC-TCC-AGC-ACG-GC       | TTC-TGA-GGG-ACC-GAG-TGG-GC       |
| Neg-Ctrl                 | GAA-GGC-TGC-ATG-GAA-ATG-AT       | GGA-TCT-GGA-TCG-GAA-GGA-AC       |

Supplementary Table S4.
