# Supplementary material for: DNA methylation signal has a major role in the response of human breast cancer cells to the microenvironment
Source: PubMed Central journal article supplement (PMC5668886; doi:10.1038/oncsis.2017.88), 2017-10-23
Supplement: oncsis201788x4.pdf [file oncsis201788x4.pdf]

Liste of Upregulated genes in common to SKBR3 and AU565

LBP  
S100A7  
TGM2  
CP  
S100A7A  
SERPINA3  
LCN2  
MUC4  
STEAP4  
NNMT  
CSF3R  
ICAM1  
PIGR  
PDZK1IP1  
SLC28A3  
FAM83A  
S100A8  
CAMP  
SOCS3  
SAA1  
CES1  
RARRES3  
PTGS1  
C1S  
CNDP1  
LYPD5  
SAA2  
FGA  
C2CD4A  
C10orf10  
PHLDB2  
MUC20  
PRDM1  
IL22RA2  
IFITM1  
AKR1B10  
GPR97  
C1R  
TMC5  
A4GALT  
B3GNT7  
CASP10  
LRG1  
SORBS1  
CYP4F11

PARP9  
MAN1A1  
PLEKHS1  
APOL1  
ELOVL3  
CTSS  
HPX  
CASP1  
PROM1  
CHI3L1  
BHLHE40  
NFE2  
LGALS9  
UCA1  
IL1R1  
CD36  
PLIN5  
GDPD1  
AKR1B15  
IFITM3  
GBP2  
ABCA1  
CD14  
FMO3  
APOL6  
SLC7A2  
UBE2L6  
HCAR2  
CLCA2  
TNFRSF14  
KLHDC7B  
PARP14  
MMP13  
TRIM22  
NLRC5  
PTPRE  
COL27A1  
BST2  
RASL11A  
C19orf66  
C1RL  
HPGD  
MRVI1  
TEAD2  
FGL1  
A2M

SUSD3  
GSDMC  
NTN4  
ITGB2-AS1  
NFAM1  
DTX3L  
TRANK1  
CASP14  
CLEC7A  
FAM78A  
CHRD  
TMEM173  
CEBPD  
UBA7  
ACOX2  
GBP3  
STAT5A  
LOC100133669  
KCNK3  
LOC284751  
HAPLN3  
ARL4D  
LINC00673  
PDGFRL  
PRKAR2B  
FUT2  
TMPRSS4  
WNT4  
GPR110  
VLDLR  
TFPI2  
HES2  
GUCY1B3  
GLYATL2  
PDK4  
SLC2A10  
SLFN5  
CSF1  
C1QTNF1  
TLR5  
ERAP2  
DHRS3  
HSD17B14  
PCSK6  
GGT5  
BATF2

DDX60  
DTX4  
SLC16A5  
GBP1  
CYP4Z1  
FUT3  
CARD6  
NFKBIZ  
VWA2  
IRF1  
FAM131B  
SOX9  
CASP4  
GLRX  
HERC6  
FHL2  
SGK1  
EPHB2  
ARAP3  
TRIB1  
DUSP27  
DNAH17  
SLC12A4  
FTH1  
BPIFB1  
TAPBPL  
ITGB6  
KSR1  
MXRA5  
PPAP2C  
RAC2  
EYA2  
ITGB2  
STAC2  
DAPK2  
C1orf228  
MCF2L  
IL1R2  
GPR37L1  
SLC1A6  
MSMB  
ADM  
IRF9  
TCHHL1  
ST6GAL1  
PPP1R1B

NRG2  
RORC  
SERPINB1  
NCOA7  
GPRC5B  
SLC43A2  
SLC35C1  
RIN3  
INSR  
CATSPERB  
ST5  
BCL6  
FAM198A  
SNAI1  
PCDH20  
SERPINA1  
ACTBL2  
TTC39B  
ATP2B4  
SLC6A6  
PARP10  
YPEL2  
SEMA4B  
NAALADL2  
ZSWIM4  
CCL2  
CADPS2  
UBASH3B  
DHX58  
LOC100129550  
MDK  
PSMB10  
DLL4  
VWA1  
TMEM2  
APOD  
ABCC4  
BTN3A1  
RAPGEF3  
ABCA4  
HOMER3  
DDR2  
CSTA  
ZNF117  
ORAI2  
DPYD

IFI35  
DAB2  
PGM2L1  
TSKU  
BMF  
CEACAM6  
SIPA1  
TLE6  
DDIT4  
RCN1  
BIN1  
WDR91  
LOXL2  
GPRC5A  
NINL  
PANX2  
SHROOM1  
FGD3  
PLEKHG7  
MSRB1  
INPP4B  
TCHH  
SH3TC1  
SOX4  
DUSP10  
IL2RB  
GYG2  
PFKFB3  
FOLR1  
TUBB3  
SUSD4  
TLE2  
C14orf182  
MAP3K8  
RHBDL2  
PLA2G4F  
TLCD2  
ARHGDIB  
CEBPB  
TP53INP1  
CD68  
NPAS2  
ELK3  
PCDH1  
MUC1  
EPDR1

MZB1  
DNAH5  
LOC100506810  
AFAP1L2  
ERV3-1  
MYLK  
UGCG  
PTGES  
VWA5A  
CYP4X1  
CDRT4  
ETV7  
CTGF  
SCCPDH  
SNX33  
ETV6  
WISP1  
ITPR1  
SAMD9  
HDAC7  
KITLG  
LRRC8C  
TNFAIP8  
RPGRIP1  
MICAL1  
ATHL1  
ARRDC3  
RNF24  
MTHFR  
TRIM38  
ERP27  
MVP  
ALPK1  
JUNB  
SYTL2  
AARD  
TMEM45A  
TPST1  
B4GALT5  
SAMD12  
GADD45B  
IFITM2  
DDIT4L  
IL15  
PTPRH  
CCDC146

PLCL2  
PLEKHG2  
TRIM6  
PLD1  
MAPK13  
ZCCHC24  
PRSS22  
TSPAN15  
AUTS2  
BCL3  
CDH5  
RUNX1  
FAIM3  
C9orf84  
EFNA5  
CCR7  
ZNF703  
XYLT1  
IL13RA1  
SLCO2A1  
GALNT16  
ELF3  
CAPN13  
MAST4  
SDCBP  
MYO18A  
NCF4  
CLINT1  
GIPR  
RIT1  
C1orf226  
RHOBTB1  
ACPP  
NRP1  
STAT3  
CNP  
SIX5  
TH  
HIF1A  
FNDC3B  
FLJ45445  
PLSCR1  
GFOD2  
IRF7  
ITGAL  
SLC16A4



ADORA1  
TSPAN3  
TCP11L2  
DLGAP1-AS1  
SLC34A3

Liste of Unaffected genes in common to SKBR3 and AU565

AAGAB  
AAMP  
AAR2  
AARS  
AARS2  
AASDH  
ABCD3  
ABCF1  
ABCF3  
ABHD11  
ABHD13  
ABHD16A  
ABHD3  
ABHD5  
ACAD10  
ACAD11  
ACADVL  
ACAP2  
ACIN1  
ACOT13  
ACOT9  
ACP6  
ACSF3  
ACTR10  
ACTR1A  
ACTR1B  
ACTR2  
ACTR3  
ACTR3B  
ACTR6  
ACVR1B  
ACVR2A  
ADAM3A  
ADAM5  
ADAMDEC1  
ADAT1  
ADCK1

ADCYAP1  
ADD1  
ADH1A  
ADH5  
ADNP  
ADNP2  
ADO  
ADSS  
AFG3L1P  
AGAP11  
AGER  
AGGF1  
AGL  
AGO1  
AGPAT6  
AHCYL1  
AHCYL2  
AHI1  
AHNAK  
AIF1  
AK3  
AKAP10  
AKAP11  
AKAP8L  
AKIRIN2  
AKT2  
ALAD  
ALAS1  
ALDH18A1  
ALDH2  
ALDH9A1  
ALG1  
ALG13  
ALG1L2  
ALG3  
ALG5  
ALG9  
ALKBH4  
ALKBH5  
AMMECR1  
AMY1B  
AMZ2P1  
ANAPC16  
ANAPC2  
ANGEL1  
ANGEL2

ANKEF1  
ANKFY1  
ANKIB1  
ANKLE2  
ANKRD13C  
ANKRD17  
ANKRD20A1  
ANKRD20A2  
ANKRD20A3  
ANKRD26  
ANKRD40  
ANKRD52  
ANP32A  
ANXA2P2  
ANXA5  
ANXA7  
AP1AR  
AP2M1  
AP3M1  
AP4B1  
AP4E1  
AP4M1  
AP5M1  
APBB2  
APC  
APEX2  
APH1A  
API5  
APLP2  
APOC4  
APOM  
APOOL  
APPL1  
AQR  
ARAF  
ARFGAP2  
ARFIP1  
ARFIP2  
ARFRP1  
ARHGAP1  
ARHGAP8  
ARHGEF2  
ARHGEF7  
ARHGEF9  
ARID1B  
ARID2

ARIH1  
ARIH2  
ARL16  
ARL3  
ARL5A  
ARL6IP4  
ARL6IP5  
ARMC8  
ARPC1A  
ARPC2  
ARPC4  
ARPC5  
ARPC5L  
ARPP19  
ASB1  
ASB18  
ASB8  
ASCC2  
ASIC3  
ASNSD1  
ASTE1  
ASXL1  
ATAD2B  
ATAT1  
ATE1  
ATF1  
ATF2  
ATF5  
ATF6B  
ATG12  
ATG2B  
ATG4B  
ATIC  
ATP11B  
ATP13A3  
ATP1A1  
ATP1B4  
ATP2B1  
ATP5SL  
ATP6AP2  
ATP6V1A  
ATP6V1B2  
ATP6V1D  
ATP6V1G2  
ATPAF2  
ATXN10

ATXN1L  
ATXN2  
ATXN7  
AUH  
AUP1  
AVEN  
AVP  
AZU1  
B3GALT4  
B4GALT3  
BABAM1  
BAG3  
BAG5  
BAG6  
BAK1  
BANF2  
BAP1  
BBS1  
BBS10  
BBS4  
BBS9  
BCAP29  
BCAP31  
BCAR3  
BCAS2  
BCKDK  
BCL2L11  
BCL2L13  
BCL2L2  
BCL7B  
BCYRN1  
BECN1  
BIRC2  
BLCAP  
BLMH  
BLOC1S5  
BLOC1S6  
BLVRB  
BLZF1  
BMPR1A  
BMS1  
BMX  
BNIP2  
BPGM  
BRAP  
BRCC3

BRD7  
BRD9  
BRF2  
BRK1  
BRPF1  
BRWD1  
BSG  
BSPH1  
BSX  
BTAF1  
BTBD9  
BTNL2  
C10orf32  
C10orf35  
C10orf53  
C10orf76  
C10orf88  
C11orf30  
C11orf40  
C11orf49  
C11orf57  
C11orf58  
C12orf29  
C12orf39  
C15orf40  
C15orf43  
C16orf92  
C17orf105  
C17orf50  
C17orf80  
C17orf85  
C18orf21  
C18orf25  
C18orf8  
C19orf52  
C1orf112  
C1orf146  
C1orf172  
C1orf27  
C1orf43  
C1orf50  
C1orf52  
C1orf74  
C2  
C21orf54  
C22orf29

C22orf39  
C2orf27B  
C2orf42  
C2orf47  
C2orf68  
C2orf80  
C3orf17  
C3orf38  
C3orf62  
C3orf79  
C4A  
C4B  
C4orf29  
C4orf51  
C5orf22  
C5orf24  
C5orf51  
C5orf52  
C5orf55  
C6orf10  
C6orf106  
C6orf120  
C6orf132  
C6orf136  
C6orf15  
C6orf211  
C6orf25  
C6orf47  
C6orf48  
C6orf89  
C7orf13  
C7orf26  
C7orf66  
C8orf33  
C9orf156  
C9orf69  
CAAP1  
CAB39  
CABLES2  
CABP5  
CACTIN  
CAMKK2  
CAMLG  
CAMSAP1  
CAMSAP2  
CAMTA1

CAPN10  
CAPN5  
CAPN7  
CAPRIN1  
CAPRIN2  
CAPZA1  
CAPZA2  
CAPZB  
CARM1  
CARS  
CASK  
CBFB  
CBLL1  
CBX1  
CBX7  
CCAR1  
CCDC117  
CCDC12  
CCDC132  
CCDC137  
CCDC167  
CCDC174  
CCDC23  
CCDC25  
CCDC47  
CCDC6  
CCL1  
CCL11  
CCL16  
CCL18  
CCL19  
CCL21  
CCL24  
CCL3L3  
CCL4L1  
CCL7  
CCND3  
CCNE1  
CCNG1  
CCNI  
CCNK  
CCNT1  
CCNT2  
CCNYL1  
CD151  
CD164



CD2AP  
CD2BP2  
CD58  
CD82  
CDAN1  
CDC16  
CDC23  
CDC27  
CDC37  
CDC37L1  
CDC40  
CDC5L  
CDC73  
CDK12  
CDK16  
CDK17  
CDK7  
CDK8  
CDKN1B  
CDSN  
CDYL  
CEBPG  
CELF1  
CEP135  
CEP192  
CEP41  
CEP44  
CEP57  
CEP63  
CEP85  
CEPT1  
CERCAM  
CERS5  
CFC1B  
CFL1  
CGB1  
CGB2  
CGB5  
CGGBP1  
CGRRF1  
CHCHD2  
CHD1  
CHD4  
CHERP  
CHMP2B  
CHMP3

CHMP4B  
CHMP7  
CHODL-AS1  
CHRAC1  
CHSY1  
CHTF8  
CHTOP  
CHUK  
CHURC1  
CIRBP  
CISD2  
CLASP2  
CLASRP  
CLC  
CLCC1  
CLCN3  
CLDN15  
CLDN22  
CLDN7  
CLDND1  
CLEC2A  
CLEC4E  
CLIC1  
CLIP1  
CLK4  
CLN8  
CLP1  
CLPP  
CLPTM1  
CLPTM1L  
CLPX  
CLSTN1  
CLTA  
CLTC  
CMAS  
CMPK1  
CNBP  
CNEP1R1  
CNNM3  
CNOT1  
CNOT11  
CNOT2  
CNOT4  
CNOT6  
CNOT7  
CNPY2

CNPY3  
COA3  
COA4  
COA5  
COG1  
COG2  
COG5  
COG7  
COG8  
COIL  
COL11A2  
COL4A3BP  
COPG2  
COPS2  
COPS5  
COPS6  
COPS7B  
COPZ1  
COQ4  
COX14  
COX15  
COX19  
COX8C  
CPEB3  
CPLX3  
CPNE1  
CPNE3  
CPSF2  
CPSF3  
CPSF4  
CPSF6  
CPSF7  
CRCP  
CREB1  
CREBL2  
CREBZF  
CREM  
CRK  
CRLF3  
CROCCP2  
CRTAP  
CRYGB  
CRYZL1  
CSAG1  
CSDE1  
CSGALNACT2

CSH1  
CSN1S2BP  
CSNK1A1  
CSNK1D  
CSNK2A1  
CSNK2A2  
CSNK2A3  
CSNK2B  
CST13P  
CSTF1  
CT45A1  
CT45A6  
CT47A1  
CT47A6  
CTBP1  
CTCF  
CTDNEP1  
CTNNA1  
CTR9  
CTSL3P  
CUL1  
CUL2  
CUL3  
CUL4A  
CUL4B  
CUL5  
CUTA  
CWC22  
CWC25  
CXorf23  
CXorf38  
CXorf40A  
CXorf40B  
CXorf56  
CXXC1  
CYB561  
CYHR1  
CYMP  
CYP20A1  
CYP21A2  
CYP2U1  
DAAM1  
DAD1  
DAG1  
DAGLB  
DAP3

DAPK3  
DARS  
DAZAP1  
DBT  
DCAF10  
DCAF11  
DCAF15  
DCAF4  
DCAF7  
DCAF8  
DCD  
DCP2  
DCTD  
DCTN2  
DCTN4  
DCTN5  
DCTN6  
DCUN1D1  
DDA1  
DDAH2  
DDB1  
DDHD1  
DDR1  
DDRKG1  
DDX19B  
DDX23  
DDX24  
DDX28  
DDX39B  
DDX42  
DDX47  
DDX5  
DDX59  
DDX6  
DECR1  
DEFA10P  
DEFA1B  
DEFA3  
DEFA4  
DEFA6  
DEFB104B  
DEFB105A  
DEFB108B  
DEFB113  
DEFB115  
DEFB116

DEFB122  
DEFB123  
DEFB124  
DEFB131  
DEFB133  
DEFB134  
DEFB135  
DEFB136  
DENND1B  
DENND1C  
DENND5A  
DENND6A  
DERA  
DET1  
DEXI  
DGAT1  
DGAT2L6  
DGCR8  
DGUOK  
DHPS  
DHX16  
DHX29  
DHX37  
DHX38  
DHX40  
DIABLO  
DIAPH1  
DICER1  
DIP2A  
DIP2B  
DIS3  
DKFZp434L192  
DKFZp566F0947  
DKFZP586I1420  
DLG1  
DMAP1  
DNAI2  
DNAJA1  
DNAJA2  
DNAJB12  
DNAJB4  
DNAJC13  
DNAJC15  
DNAJC25  
DNAJC27  
DNAJC4

DNAJC5G  
DNAJC8  
DNAL4  
DNASE1  
DND1  
DNPEP  
DOCK3  
DOCK9  
DPAGT1  
DPCR1  
DPF2  
DPM2  
DPM3  
DPY19L3  
DPY19L4  
DPY30  
DRG2  
DROSHA  
DSCR3  
DSP  
DST  
DSTYK  
DTNB  
DUSP11  
DUSP12  
DUSP3  
DVL3  
DYNC1LI1  
DYNLL2  
DYNLRB1  
DYNLT1  
DYRK1A  
E2F4  
E2F6  
EAF1  
EAPP  
EBPL  
ECI1  
EDC3  
EDF1  
EED  
EFCAB1  
EFCAB2  
EFCAB7  
EFHD2  
EFR3B

EFTUD2  
EGFL8  
EHBP1  
EHF  
EHMT1  
EHMT2  
EIF1AD  
EIF1B  
EIF2A  
EIF2AK1  
EIF2AK4  
EIF2B5  
EIF3A  
EIF3G  
EIF3I  
EIF4A1  
EIF4A2  
EIF4E2  
EIF4EBP2  
EIF4ENIF1  
EIF4G1  
EIF4G2  
EIF4H  
EIF5  
EIF5B  
ELAC1  
ELAVL1  
ELF2  
ELK1  
ELMOD2  
ELP3  
ELP4  
ELP5  
ELSPBP1  
EMC1  
EMC3  
EMC4  
EMX2OS  
ENTPD6  
EPB41L5  
EPCAM  
EPHB3  
EPM2AIP1  
EPN2  
EPS15  
EPS8L1



EPS8L2  
ERCC1  
ERCC3  
ERCC6  
ERGIC3  
ESCO1  
ESRP1  
ESYT2  
ETAA1  
ETF1  
ETNK1  
EWSR1  
EXOC1  
EXOC2  
EXOC5  
EXOC8  
EXOSC1  
EXT2  
EXTL3  
EYA3  
F11R  
FABP9  
FADD  
FAHD1  
FAM104A  
FAM114A2  
FAM115A  
FAM117B  
FAM118A  
FAM120A  
FAM120B  
FAM124A  
FAM134A  
FAM135A  
FAM138B  
FAM13B  
FAM149B1  
FAM153B  
FAM159A  
FAM160A2  
FAM163B  
FAM173B  
FAM175B  
FAM178A  
FAM189B  
FAM193A

FAM195B  
FAM197Y2  
FAM199X  
FAM19A1  
FAM206A  
FAM208A  
FAM217B  
FAM219B  
FAM32A  
FAM49B  
FAM50A  
FAM53C  
FAM73A  
FAM76B  
FAM83H  
FAM8A1  
FAM96A  
FAM98A  
FAM99A  
FASTK  
FASTKD3  
FASTKD5  
FBRSL1  
FBXL17  
FBXO11  
FBXO18  
FBXO21  
FBXO22  
FBXO3  
FBXO30  
FBXO31  
FBXO33  
FBXO38  
FBXO42  
FBXO7  
FBXW4  
FBXW7  
FEM1C  
FERMT3  
FGF16  
FHDC1  
FIP1L1  
FKBP14  
FKBPL  
FLII  
FLJ10038

FLJ31306  
FLJ46361  
FLOT1  
FMR1  
FNBP1L  
FNBP4  
FNTA  
FOXJ2  
FOXK2  
FOXN3-AS2  
FPGS  
FRAT2  
FRG1B  
FRG2  
FRG2C  
FRS2  
FRYL  
FTO  
FUBP3  
FUCA2  
FUK  
FUNDC1  
FUNDC2  
FUT1  
FUZ  
FXR1  
FYCO1  
FYTTD1  
FZD3  
G3BP1  
G3BP2  
GABBR1  
GABPA  
GAGE10  
GAGE12G  
GAGE2A  
GAGE2C  
GAGE2D  
GAGE2E  
GAGE5  
GALE  
GALK2  
GALNT3  
GALT  
GAN  
GAPDH

GAPVD1  
GAS2L1  
GATAD2A  
GATAD2B  
GATC  
GBE1  
GCA  
GCDH  
GCH1  
GCLC  
GDI1  
GEMIN7  
GFER  
GFM2  
GGA1  
GGA2  
GGH  
GGNBP2  
GGPS1  
GHDC  
GHITM  
GHRH  
GID8  
GIGYF2  
GIN1  
GINM1  
GIP  
GIT2  
GK5  
GLA  
GLTSCR1L  
GLUL  
GLYR1  
GMPR2  
GNA12  
GNA13  
GNAI3  
GNB1  
GNB2L1  
GNG5  
GNG8  
GNL1  
GNL3  
GOLGA4  
GOLGA7  
GOPC

GORASP1  
GOSR1  
GPANK1  
GPATCH1  
GPATCH3  
GPATCH8  
GPBP1  
GPBP1L1  
GPD1L  
GPI  
GPKOW  
GPR180  
GPSM3  
GPT2  
GPX5  
GRB2  
GRP  
GRSF1  
GSC2  
GSE1  
GSK3A  
GSPT1  
GSS  
GSTO1  
GSTTP2  
GTF2E2  
GTF2H1  
GTF2H3  
GTF2H4  
GTF3C2  
GTF3C4  
GUCA2B  
GXYLT1  
GYG1  
GYPB  
GYS1  
GZF1  
GZMK  
H3F3B  
HACE1  
HAGH  
HAR1B  
HARS  
HARS2  
HAUS6  
HCG18

HCG22  
HCG26  
HCG27  
HCG4  
HCG9  
HCP5  
HDAC1  
HDAC3  
HDAC8  
HDHD2  
HEATR3  
HEATR5B  
HEATR6  
HEBP2  
HECTD1  
HELQ  
HERC2  
HES3  
HEXB  
HHATL  
HIATL1  
HIF1AN  
HIGD1A  
HIGD1C  
HIGD2A  
HIPK1  
HIRA  
HIST2H2AA3  
HKR1  
HLA-DMB  
HLA-DOA  
HLA-DOB  
HLA-DPA1  
HLA-DPB1  
HLA-DPB2  
HLA-DQA2  
HLA-DQB2  
HLA-DRA  
HLA-DRB6  
HLA-F  
HLA-G  
HLA-J  
HLA-L  
HLCS  
HMGXB4  
HNRNPA0

HNRNPF  
HNRNPK  
HNRNPUL1  
HOOK3  
HOXD11  
HP1BP3  
HPS4  
HPS6  
HPVC1  
HPYR1  
HS2ST1  
HSBP1  
HSD17B12  
HSD17B8  
HSF1  
HSFX2  
HSPA1A  
HSPA1L  
HTATSF1  
HTN3  
HTRA2  
HTT  
HUS1  
HYALP1  
IDE  
IDH3G  
IER3IP1  
IFFO2  
IFI30  
IFIH1  
IFITM4P  
IFT20  
IFT52  
IFT80  
IFT81  
IFT88  
IK  
IKZF5  
IL22  
IL26  
IL36B  
IL9  
ILF2  
ILF3  
IMPAD1  
ING1

ING3  
INPP4A  
INPP5E  
INPP5K  
INTS10  
INTS4  
INTS5  
INTS7  
INTS8  
INVS  
IP6K1  
IQCB1  
IQCG  
IREB2  
ISCA2  
ISOC2  
IST1  
ITCH  
ITFG2  
ITFG3  
ITGAV  
ITPA  
JKAMP  
JMJD7  
JMJD8  
JOSD1  
KANSL1L  
KANSL2  
KANSL3  
KAT2A  
KAT5  
KAT7  
KAT8  
KATNB1  
KATNBL1  
KBTBD2  
KBTBD7  
KCMF1  
KCNJ14  
KCNN4  
KCNQ1DN  
KCTD18  
KCTD2  
KDM1A  
KDM2A  
KEAP1



KHDRBS1  
KHDRBS2  
KHSRP  
KIAA0040  
KIAA0100  
KIAA0141  
KIAA0196  
KIAA0368  
KIAA0895L  
KIAA1033  
KIAA1147  
KIAA1191  
KIAA1279  
KIAA1324L  
KIAA1467  
KIAA1598  
KIAA1715  
KIAA1841  
KIAA2013  
KIDINS220  
KIF16B  
KIF3B  
KIF5B  
KIFAP3  
KIFC1  
KIFC2  
KIN  
KIR2DL4  
KIR3DL2  
KLC4  
KLF12  
KLF16  
KLF3  
KLF7  
KLF9  
KLHDC3  
KLHL28  
KLHL8  
KLHL9  
KLK4  
KLKP1  
KPNA1  
KPNA6  
KRAS  
KRBOX4  
KRI1

KRIT1  
KRR1  
KRTAP10-6  
KRTAP12-4  
KRTAP19-3  
KRTAP19-4  
KRTAP19-8  
KRTAP2-1  
KRTAP2-2  
KRTAP2-4  
KRTAP20-1  
KRTAP20-4  
KRTAP21-1  
KRTAP21-3  
KRTAP22-1  
KRTAP22-2  
KRTAP23-1  
KRTAP4-5  
KRTAP5-3  
KRTAP5-4  
KRTAP5-5  
KRTAP6-2  
KRTCAP2  
KRTDAP  
KTI12  
KXD1  
L3MBTL2  
LACRT  
LACTB  
LALBA  
LAMP1  
LAMTOR2  
LAMTOR3  
LAMTOR4  
LAMTOR5  
LANCL2  
LARP1  
LARP1B  
LARP4  
LARP4B  
LARP7  
LATS2  
LCE1A  
LCE1D  
LCE1E  
LCE2B

LCE2C  
LCE2D  
LCE4A  
LCE6A  
LCMT1  
LCN1  
LCN6  
LCN9  
LDB1  
LDHA  
LDOC1L  
LEPROTL1  
LETMD1  
LGALS7  
LGALS7B  
LGMN  
LHPP  
LIMD1  
LIMS1  
LIN54  
LIN7C  
LINC00113  
LINC00114  
LINC00159  
LINC00161  
LINC00207  
LINC00238  
LINC00261  
LINC00301  
LINC00320  
LINC00339  
LINC00474  
LINC00488  
LINC00575  
LINC00588  
LMBR1  
LOC100129935  
LOC100133050  
LOC100169752  
LOC100190940  
LOC100192426  
LOC100287834  
LOC144742  
LOC145474  
LOC146481  
LOC148145

LOC148413  
LOC154449  
LOC220729  
LOC255025  
LOC283856  
LOC283914  
LOC284276  
LOC284688  
LOC284788  
LOC285627  
LOC285696  
LOC286135  
LOC339568  
LOC339788  
LOC340074  
LOC340094  
LOC340357  
LOC389033  
LOC389332  
LOC400657  
LOC493754  
LOC606724  
LOC643923  
LOC644669  
LOC646498  
LOC648691  
LOC727677  
LOC729121  
LOC730811  
LOC731779  
LOC732275  
LPPR2  
LRRC28  
LRRC37BP1  
LRRC42  
LRRC47  
LRRC57  
LRRC59  
LRRC8E  
LRRFIP2  
LRSAM1  
LSM14A  
LSM14B  
LSM2  
LST1  
LTA

LTA4H  
LTB  
LTN1  
LUZP6  
LY6G5B  
LY6G5C  
LY6G6C  
LY6G6D  
LY6G6E  
LY6G6F  
LY6H  
LY86  
LYRM2  
LYSMD1  
LYZL1  
LZTFL1  
LZTR1  
M6PR  
MAD2L1BP  
MAEA  
MAF1  
MAGEA12  
MAGEA3  
MALT1  
MAN2A2  
MANBAL  
MAP2K1  
MAP2K3  
MAP2K5  
MAP3K2  
MAP3K3  
MAP3K6  
MAP3K7  
MAP4  
MAP4K3  
MAP4K5  
MAP7D3  
MAPK1  
MAPK1IP1L  
MAPKAPK2  
MAPKAPK5  
MAPRE1  
MARCH5  
MARCH7  
MARK3  
MARVELD2

MAS1L  
MAT2B  
MAX  
MB  
MBD1  
MBD2  
MBIP  
MBNL1  
MBOAT1  
MBTPS1  
MBTPS2  
MCCC1  
MCCC2  
MCCD1  
MCM9  
MCOLN1  
MCPH1  
MCRS1  
MDC1  
MDFI  
MDM2  
MDM4  
MED1  
MED10  
MED11  
MED14  
MED17  
MED19  
MED20  
MED29  
MED31  
MED6  
MEF2A  
METTL11B  
METTL13  
METTL14  
METTL18  
METTL22  
METTL24  
METTL25  
METTL2B  
METTL3  
METTL6  
METTL9  
MEX3C  
MFAP1

MFAP3  
MFAP3L  
MFSD8  
MGA  
MGAT4B  
MGC15885  
MGC27382  
MGC34034  
MGC72080  
MGEA5  
MGST2  
MIB1  
MICA  
MICB  
MIER1  
MIR1-1  
MIR1-2  
MIR100  
MIR101-1  
MIR103A1  
MIR105-1  
MIR105-2  
MIR106A  
MIR107  
MIR10A  
MIR10B  
MIR1178  
MIR1179  
MIR1180  
MIR1181  
MIR1182  
MIR1185-1  
MIR1185-2  
MIR1200  
MIR1203  
MIR1204  
MIR1205  
MIR1207  
MIR1208  
MIR122  
MIR1224  
MIR1225  
MIR1226  
MIR1228  
MIR1229  
MIR1234

MIR1237  
MIR124-1  
MIR124-2  
MIR124-3  
MIR1243  
MIR1246  
MIR1247  
MIR1249  
MIR1250  
MIR1251  
MIR1252  
MIR1253  
MIR1256  
MIR1257  
MIR1258  
MIR125A  
MIR125B1  
MIR125B2  
MIR126  
MIR1262  
MIR1265  
MIR1266  
MIR127  
MIR1272  
MIR1275  
MIR1276  
MIR1278  
MIR1279  
MIR128-2  
MIR1281  
MIR1283-1  
MIR1283-2  
MIR1284  
MIR1286  
MIR1287  
MIR1288  
MIR1289-2  
MIR129-1  
MIR129-2  
MIR1292  
MIR1296  
MIR1297  
MIR1301  
MIR1304  
MIR1305  
MIR1306



MIR130A  
MIR130B  
MIR132  
MIR1322  
MIR1323  
MIR1324  
MIR133A1  
MIR133B  
MIR134  
MIR135A1  
MIR135A2  
MIR135B  
MIR136  
MIR137  
MIR138-1  
MIR138-2  
MIR140  
MIR141  
MIR142  
MIR143  
MIR145  
MIR1468  
MIR1469  
MIR146B  
MIR1470  
MIR1471  
MIR147B  
MIR148A  
MIR148B  
MIR150  
MIR152  
MIR153-2  
MIR1538  
MIR1539  
MIR154  
MIR155  
MIR15A  
MIR15B  
MIR16-1  
MIR16-2  
MIR181A1  
MIR181A2  
MIR181B1  
MIR181B2  
MIR181C  
MIR181D

MIR182  
MIR1827  
MIR183  
MIR184  
MIR185  
MIR187  
MIR188  
MIR1908  
MIR190B  
MIR191  
MIR1910  
MIR1911  
MIR1912  
MIR1913  
MIR1914  
MIR1915  
MIR192  
MIR193A  
MIR193B  
MIR194-2  
MIR195  
MIR196A1  
MIR196A2  
MIR196B  
MIR197  
MIR1973  
MIR1976  
MIR198  
MIR199A1  
MIR199A2  
MIR199B  
MIR19A  
MIR200A  
MIR200B  
MIR200C  
MIR202  
MIR204  
MIR2052  
MIR2053  
MIR2054  
MIR206  
MIR208B  
MIR20B  
MIR21  
MIR211  
MIR2110

MIR2113  
MIR2114  
MIR2116  
MIR2117  
MIR212  
MIR215  
MIR216A  
MIR216B  
MIR218-1  
MIR218-2  
MIR221  
MIR222  
MIR223  
MIR2276  
MIR2278  
MIR23A  
MIR23B  
MIR24-1  
MIR24-2  
MIR26B  
MIR27A  
MIR27B  
MIR296  
MIR298  
MIR299  
MIR29A  
MIR29B1  
MIR29B2  
MIR300  
MIR301A  
MIR301B  
MIR302A  
MIR302D  
MIR30A  
MIR30B  
MIR30C1  
MIR30C2  
MIR30D  
MIR30E  
MIR32  
MIR320B1  
MIR320C1  
MIR320C2  
MIR320D1  
MIR320D2  
MIR328

MIR329-1  
MIR329-2  
MIR330  
MIR331  
MIR335  
MIR337  
MIR339  
MIR33A  
MIR340  
MIR345  
MIR346  
MIR34B  
MIR363  
MIR365A  
MIR367  
MIR369  
MIR372  
MIR373  
MIR374A  
MIR374B  
MIR375  
MIR376B  
MIR377  
MIR379  
MIR380  
MIR381  
MIR382  
MIR383  
MIR384  
MIR409  
MIR410  
MIR411  
MIR412  
MIR423  
MIR424  
MIR425  
MIR429  
MIR431  
MIR432  
MIR433  
MIR449A  
MIR449B  
MIR449C  
MIR450A1  
MIR450B  
MIR454

MIR455  
MIR483  
MIR484  
MIR485  
MIR487A  
MIR487B  
MIR488  
MIR489  
MIR490  
MIR493  
MIR494  
MIR495  
MIR496  
MIR498  
MIR502  
MIR503  
MIR504  
MIR505  
MIR506  
MIR507  
MIR508  
MIR509-1  
MIR509-2  
MIR509-3  
MIR510  
MIR512-1  
MIR512-2  
MIR514A3  
MIR515-1  
MIR515-2  
MIR516A1  
MIR516A2  
MIR516B1  
MIR516B2  
MIR517A  
MIR517B  
MIR517C  
MIR518A1  
MIR518A2  
MIR518B  
MIR518C  
MIR518D  
MIR518E  
MIR518F  
MIR519A1  
MIR519A2

MIR519B  
MIR519C  
MIR519D  
MIR519E  
MIR520A  
MIR520B  
MIR520E  
MIR520F  
MIR520G  
MIR521-1  
MIR522  
MIR523  
MIR524  
MIR525  
MIR526A1  
MIR526A2  
MIR526B  
MIR532  
MIR539  
MIR542  
MIR543  
MIR545  
MIR548A1  
MIR548B  
MIR548C  
MIR548D2  
MIR548F1  
MIR548F2  
MIR548F3  
MIR548F5  
MIR548G  
MIR548H3  
MIR548H4  
MIR548I2  
MIR548I3  
MIR548I4  
MIR548J  
MIR548N  
MIR548Q  
MIR551B  
MIR553  
MIR556  
MIR557  
MIR558  
MIR559  
MIR563

MIR567  
MIR568  
MIR572  
MIR573  
MIR574  
MIR575  
MIR577  
MIR578  
MIR580  
MIR581  
MIR583  
MIR585  
MIR590  
MIR591  
MIR592  
MIR595  
MIR596  
MIR597  
MIR598  
MIR599  
MIR600  
MIR601  
MIR602  
MIR603  
MIR604  
MIR605  
MIR609  
MIR611  
MIR613  
MIR614  
MIR617  
MIR618  
MIR620  
MIR621  
MIR626  
MIR627  
MIR628  
MIR629  
MIR632  
MIR636  
MIR637  
MIR638  
MIR639  
MIR643  
MIR648  
MIR651

MIR653  
MIR654  
MIR655  
MIR656  
MIR657  
MIR661  
MIR662  
MIR663A  
MIR665  
MIR668  
MIR670  
MIR671  
MIR675  
MIR7-2  
MIR7-3  
MIR708  
MIR711  
MIR718  
MIR744  
MIR758  
MIR759  
MIR760  
MIR761  
MIR762  
MIR764  
MIR765  
MIR767  
MIR769  
MIR770  
MIR802  
MIR874  
MIR877  
MIR885  
MIR888  
MIR889  
MIR890  
MIR891A  
MIR891B  
MIR892A  
MIR892B  
MIR9-1  
MIR9-3  
MIR920  
MIR921  
MIR922  
MIR92A1



MIR92B  
MIR933  
MIR938  
MIR940  
MIR941-1  
MIR941-3  
MIR942  
MIR943  
MIR96  
MIR98  
MIR99A  
MIRLET7A1  
MIRLET7A2  
MIRLET7A3  
MIRLET7B  
MIRLET7C  
MIRLET7D  
MIRLET7F2  
MIRLET7G  
MIRLET7I  
MITD1  
MKLN1  
MKNK1  
MKRN2  
MLF2  
MLLT3  
MLN  
MLXIPL  
MMAA  
MMADHC  
MMP23A  
MMP23B  
MMS19  
MNAT1  
MOB1A  
MOCS3  
MOG  
MORC2  
MORC3  
MOXD2P  
MPHOSPH10  
MPHOSPH8  
MPND  
MPP5  
MPP7  
MPRIP

MRAP  
MRC1  
MRFAP1L1  
MRI1  
MRPL14  
MRPL9  
MRPS10  
MRPS14  
MRPS15  
MRPS18B  
MRPS26  
MS4A13  
MS4A6E  
MSH3  
MSH5  
MSL1  
MSL2  
MT1B  
MT1E  
MT4  
MTA2  
MTERFD3  
MTF1  
MTFMT  
MTFR1L  
MTG1  
MTHFD2  
MTIF3  
MTM1  
MTMR10  
MTMR12  
MTMR14  
MTMR2  
MTMR4  
MTMR6  
MTOR  
MTRF1  
MUC21  
MYB  
MYBBP1A  
MYL10  
MYL12A  
MYL6B  
MYNN  
MYO1E  
MYSM1

N4BP1  
NAA16  
NAA25  
NAA30  
NAA35  
NAA60  
NACC2  
NADK  
NADSYN1  
NANP  
NAPA  
NAPB  
NAPG  
NARF  
NARS  
NAT10  
NBAS  
NBN  
NCEH1  
NCK1  
NCKAP1  
NCOR1  
NCR3  
NCRUPAR  
NDFIP1  
NDFIP2  
NDNL2  
NDRG3  
NDUFA11  
NDUFB11  
NEDD8  
NEK7  
NELFA  
NELFCD  
NELFE  
NEMF  
NEU1  
NF2  
NFATC2IP  
NFATC3  
NFKBID  
NFRKB  
NHEG1  
NIN  
NIPA2  
NKIRAS1

NKIRAS2  
NKTR  
NKX6-3  
NLK  
NLRX1  
NME2  
NME6  
NMNAT1  
NMS  
NMT1  
NMT2  
NOL3  
NONO  
NOTCH2  
NOTCH4  
NPEPPS  
NPHP3  
NPRL3  
NPSR1-AS1  
NPTN  
NPY  
NR2C1  
NRAS  
NRBP2  
NRD1  
NRDE2  
NRM  
NSD1  
NSFL1C  
NSMCE2  
NSRP1  
NSUN4  
NT5C3B  
NUB1  
NUBP1  
NUDT12  
NUDT13  
NUDT16L1  
NUDT18  
NUDT9  
NUP153  
NUP160  
NUP214  
NUP98  
NUPL1  
NXF1

NXF5  
OCIAD1  
OCM  
OCM2  
OCRL  
OFD1  
OGDHL  
OGFOD3  
OPN1LW  
OPN1MW  
OPN1MW2  
OR10C1  
OR11A1  
OR12D2  
OR14J1  
OR2B3  
OR2H1  
OR2H2  
OR2J2  
OR2T12  
OR2T29  
OR2T33  
OR2T5  
OR2T8  
OR2W1  
OR4F5  
OR5V1  
OR7E37P  
ORAI1  
ORC4  
ORMDL2  
ORMDL3  
OSBPL10  
OSBPL3  
OSTF1  
OTUB1  
OTUD4  
OXA1L  
OXLD1  
OXT  
P2RX6P  
PABPN1L  
PACS2  
PAF1  
PAFAH1B2  
PAGE3

PAIP2B  
PAK2  
PAK4  
PALB2  
PAN2  
PANK2  
PANK3  
PAOX  
PAPD4  
PAPD7  
PAPOLA  
PAPSS1  
PARG  
PARN  
PARP11  
PARP6  
PATL1  
PAX9  
PAXBP1  
PAXIP1  
PBDC1  
PCBP1  
PCF11  
PCMTD2  
PCNAP1  
PCNX  
PCSK7  
PCYOX1  
PDCD10  
PDCD6  
PDCD6IP  
PDCD7  
PDHB  
PDLIM5  
PDPK1  
PDPR  
PDS5A  
PDS5B  
PDSS2  
PDXDC1  
PELP1  
PEMT  
PER4  
PEX1  
PEX10  
PEX11B

PEX12  
PEX19  
PEX2  
PEX26  
PEX5  
PFDN5  
PFDN6  
PFN1  
PGA3  
PGBD2  
PGGT1B  
PGK1  
PHACTR4  
PHAX  
PHC3  
PHF1  
PHF14  
PHF20  
PHF20L1  
PHF23  
PHF6  
PHGR1  
PHKA1  
PHKB  
PHLPP1  
PHLPP2  
PHTF2  
PI4KA  
PI4KB  
PICALM  
PIGB  
PIGC  
PIGL  
PIGO  
PIGP  
PIGS  
PIGT  
PIH1D1  
PIH1D3  
PIK3R4  
PIP4K2B  
PISRT1  
PITPNB  
PKM  
PKNOX1  
PLA2G2C

PLA2G2E  
PLAA  
PLAGL2  
PLEKHA1  
PLEKHA3  
PLEKHA8P1  
PLEKHF2  
PLEKHG3  
PLRG1  
PLS3  
PMM2  
PMP2  
PMPCB  
PMS2  
PNKP  
PNPLA2  
PNPLA6  
POC1B  
POC5  
POFUT1  
POGK  
POLI  
POLK  
POLL  
POLR2A  
POLR2B  
POLR2C  
POLR2E  
POLR3A  
POLR3C  
POLR3E  
POM121  
POM121C  
POMT1  
POT1  
POTED  
PPA2  
PPBPP2  
PPHLN1  
PPIC  
PPIE  
PPIL2  
PPIL4  
PPIP5K1  
PPIP5K2  
PPM1A



PPM1D  
PPP1CB  
PPP1R10  
PPP1R12A  
PPP1R12B  
PPP1R13L  
PPP1R15B  
PPP1R18  
PPP1R2  
PPP1R35  
PPP1R3D  
PPP1R42  
PPP2CA  
PPP2CB  
PPP2R1A  
PPP2R2A  
PPP2R2D  
PPP2R5A  
PPP2R5C  
PPP2R5E  
PPP4R1  
PPP4R2  
PPP6C  
PPP6R3  
PPT2  
PPTC7  
PPWD1  
PQLC1  
PRAF2  
PRAMEF2  
PRAMEF20  
PRCC  
PRDM15  
PRDM2  
PRDX4  
PRDX5  
PREP  
PRKACA  
PRKAG2  
PRKCI  
PRKCSH  
PRLH  
PRMT2  
PRMT6  
PRNP  
PROSER1

PRPF18  
PRPF3  
PRPF31  
PRPF38B  
PRPF40A  
PRPF8  
PRPSAP1  
PRPSAP2  
PRR15L  
PRR21  
PRR3  
PRR5  
PRRT1  
PRSS41  
PRSS54  
PSEENEN  
PSMA1  
PSMA3  
PSMA4  
PSMA5  
PSMA8  
PSMB2  
PSMB3  
PSMB4  
PSMB5  
PSMB6  
PSMB8  
PSMB9  
PSMC2  
PSMC4  
PSMC5  
PSMC6  
PSMD11  
PSMD12  
PSMD3  
PSMD5  
PSMD9  
PSME4  
PSORS1C1  
PSORS1C2  
PSORS1C3  
PSPC1  
PTAR1  
PTBP1  
PTDSS2  
PTGR2

PTH2  
PTPN1  
PTPN11  
PTPN2  
PTPRA  
PUM2  
PURB  
PUS7L  
PUSL1  
PVR  
PVRL4  
PWRN1  
PYCR2  
PYGO2  
PYHIN1  
QARS  
QRICH1  
RAB10  
RAB11A  
RAB11FIP2  
RAB18  
RAB1B  
RAB21  
RAB22A  
RAB24  
RAB2A  
RAB35  
RAB3D  
RAB3GAP1  
RAB3GAP2  
RAB5A  
RAB6A  
RAB7A  
RABEP1  
RABGAP1  
RABGGTA  
RABIF  
RAC1  
RAD21  
RAD23B  
RAD50  
RAD52  
RAD9A  
RAE1  
RAF1  
RALA

RALBP1  
RALGAPB  
RANBP2  
RANBP6  
RANBP9  
RAP1A  
RAP1B  
RAP2A  
RAP2B  
RARS  
RASA3  
RASEF  
RBAK  
RBBP5  
RBBP6  
RBFOX2  
RBM15  
RBM15B  
RBM18  
RBM22  
RBM25  
RBM26  
RBM27  
RBM33  
RBM38  
RBM39  
RBM4  
RBM45  
RBM5  
RBM6  
RBMXL1  
RBPJ  
RCAN3  
RCC2  
RCN2  
RCOR1  
RDH14  
RDX  
REG1B  
RELL2  
REPS1  
RER1  
RERE  
RETNLB  
REV1  
REV3L

REXO2  
RFC1  
RFK  
RFWD2  
RFXANK  
RGL2  
RGMB  
RGPD5  
RGS13  
RGS3  
RHBDD1  
RHOA  
RHOG  
RHOT1  
RIC8A  
RING1  
RINT1  
RIOK2  
RLF  
RLIM  
RMDN3  
RMND5A  
RMND5B  
RNASE9  
RNASEH1  
RNASEK  
RNF11  
RNF111  
RNF115  
RNF121  
RNF13  
RNF130  
RNF14  
RNF144B  
RNF168  
RNF170  
RNF185  
RNF187  
RNF19B  
RNF20  
RNF216P1  
RNF220  
RNF38  
RNF39  
RNF4  
RNF5

RNF5P1  
RNF6  
RNF8  
RNPEP  
RNU12  
RNU5E-1  
RNY5  
RPAIN  
RPAP1  
RPAP2  
RPAP3  
RPE  
RPL13AP17  
RPL13AP5  
RPL19  
RPL23AP32  
RPL29P2  
RPL3  
RPL36A  
RPL36AL  
RPL8  
RPP14  
RPP21  
RPP38  
RPRD2  
RPS15  
RPS18  
RPS4X  
RPS4Y2  
RPS5  
RPS6KA5  
RPS6KB1  
RPS6KC1  
RPS9  
RPUUSD2  
RPUUSD3  
RRAS  
RRM2B  
RRNAD1  
RSRC2  
RTCA  
RTF1  
RTTN  
RUFY1  
RUFY2  
RXRB

RYBP  
S100A7L2  
S100G  
S100PBP  
S100Z  
SAA3P  
SACM1L  
SAFB  
SAFB2  
SAMD1  
SAP130  
SAP30BP  
SAP30L  
SAPCD1  
SAR1A  
SARS  
SARS2  
SART1  
SART3  
SBF2  
SCAF11  
SCAF4  
SCAF8  
SCAMP1  
SCAMP3  
SCAND2P  
SCAND3  
SCARB2  
SCARNA1  
SCARNA14  
SCARNA18  
SCARNA20  
SCARNA23  
SCFD1  
SCGB1D4  
SCNM1  
SCP2  
SCRN1  
SCRN2  
SCYL2  
SDAD1  
SDC4  
SDC4P  
SDCCAG3  
SDE2  
SDHAF1

SDHAF2  
SDR42E1  
SEC11A  
SEC23IP  
SEC24B  
SEC61A2  
SEC62  
SEMA4F  
SENP1  
SENP5  
SENP6  
SENP7  
SEPN1  
SEPSECS  
SERF2  
SETD2  
SETD3  
SETD4  
SETD8  
SETDB1  
SETDB2  
SF3A1  
SF3B1  
SF3B3  
SF3B4  
SFSWAP  
SFT2D1  
SFT2D3  
SFTA1P  
SFTA2  
SFTA3  
SFXN1  
SGPL1  
SGSM1  
SH2B1  
SH2D4A  
SH3GLB1  
SH3YL1  
SHARPIN  
SHMT2  
SHOC2  
SHPK  
SIKE1  
SIPA1L1  
SIRT1  
SIRT3



SKAP2  
SKI  
SKIV2L  
SKIV2L2  
SKP1  
SLAIN1  
SLC12A6  
SLC12A8  
SLC15A4  
SLC19A2  
SLC20A2  
SLC25A14  
SLC25A16  
SLC25A36  
SLC25A38  
SLC25A3P1  
SLC25A44  
SLC25A46  
SLC30A9  
SLC35A1  
SLC35A3  
SLC35B4  
SLC35D1  
SLC35F2  
SLC35G1  
SLC36A4  
SLC38A6  
SLC39A1  
SLC39A11  
SLC39A7  
SLC39A9  
SLC41A1  
SLC44A4  
SLC4A1AP  
SLC4A2  
SLC5A3  
SLC5A6  
SLC7A1  
SLC9A6  
SLC9A7  
SLMAP  
SLTM  
SLX1A  
SLX1B  
SMAD1  
SMAD2

SMAD5  
SMAP1  
SMARCA4  
SMARCA5  
SMARCAD1  
SMARCAL1  
SMARCB1  
SMARCC1  
SMARCC2  
SMARCD1  
SMARCD2  
SMARCE1  
SMEK1  
SMEK2  
SMG1  
SMG5  
SMG6  
SMG7  
SMG9  
SMIM15  
SMIM7  
SMPD2  
SMPDL3A  
SMU1  
SMYD4  
SNAP47  
SNAPC1  
SNAPC3  
SNAPIN  
SNAR-C3  
SNAR-D  
SNAR-E  
SNAR-F  
SNAR-G1  
SNAR-G2  
SNAR-H  
SNAR-I  
SNHG7  
SNORA11B  
SNORA13  
SNORA26  
SNORA30  
SNORA35  
SNORA36C  
SNORA37  
SNORA38

SNORA49  
SNORA54  
SNORA55  
SNORA59A  
SNORA74B  
SNORA79  
SNORA7A  
SNORA80B  
SNORD100  
SNORD103A  
SNORD105  
SNORD107  
SNORD109A  
SNORD11  
SNORD110  
SNORD111  
SNORD111B  
SNORD113-1  
SNORD113-2  
SNORD113-4  
SNORD113-5  
SNORD113-6  
SNORD113-7  
SNORD113-9  
SNORD114-1  
SNORD114-10  
SNORD114-11  
SNORD114-12  
SNORD114-13  
SNORD114-14  
SNORD114-15  
SNORD114-16  
SNORD114-17  
SNORD114-18  
SNORD114-19  
SNORD114-20  
SNORD114-21  
SNORD114-22  
SNORD114-23  
SNORD114-25  
SNORD114-26  
SNORD114-27  
SNORD114-28  
SNORD114-29  
SNORD114-3  
SNORD114-30

SNORD114-31  
SNORD114-4  
SNORD114-5  
SNORD114-6  
SNORD114-7  
SNORD114-8  
SNORD114-9  
SNORD115-1  
SNORD115-10  
SNORD115-11  
SNORD115-12  
SNORD115-13  
SNORD115-14  
SNORD115-15  
SNORD115-16  
SNORD115-2  
SNORD115-21  
SNORD115-22  
SNORD115-24  
SNORD115-25  
SNORD115-27  
SNORD115-28  
SNORD115-3  
SNORD115-30  
SNORD115-31  
SNORD115-32  
SNORD115-33  
SNORD115-35  
SNORD115-37  
SNORD115-38  
SNORD115-39  
SNORD115-4  
SNORD115-40  
SNORD115-41  
SNORD115-44  
SNORD115-48  
SNORD115-5  
SNORD115-6  
SNORD115-7  
SNORD115-8  
SNORD115-9  
SNORD116-1  
SNORD116-10  
SNORD116-11  
SNORD116-12  
SNORD116-13

SNORD116-14  
SNORD116-15  
SNORD116-16  
SNORD116-18  
SNORD116-19  
SNORD116-2  
SNORD116-20  
SNORD116-21  
SNORD116-22  
SNORD116-23  
SNORD116-24  
SNORD116-25  
SNORD116-26  
SNORD116-28  
SNORD116-29  
SNORD116-4  
SNORD116-7  
SNORD116-8  
SNORD116-9  
SNORD119  
SNORD123  
SNORD124  
SNORD125  
SNORD126  
SNORD127  
SNORD18A  
SNORD18C  
SNORD1A  
SNORD1B  
SNORD1C  
SNORD2  
SNORD24  
SNORD26  
SNORD27  
SNORD29  
SNORD30  
SNORD32B  
SNORD34  
SNORD36A  
SNORD36B  
SNORD36C  
SNORD37  
SNORD38A  
SNORD38B  
SNORD41  
SNORD42A

SNORD42B  
SNORD43  
SNORD45C  
SNORD48  
SNORD4A  
SNORD50A  
SNORD50B  
SNORD53  
SNORD54  
SNORD55  
SNORD56  
SNORD56B  
SNORD57  
SNORD58A  
SNORD59A  
SNORD59B  
SNORD6  
SNORD63  
SNORD66  
SNORD7  
SNORD71  
SNORD72  
SNORD74  
SNORD75  
SNORD78  
SNORD8  
SNORD80  
SNORD81  
SNORD82  
SNORD84  
SNORD85  
SNORD86  
SNORD88A  
SNORD91B  
SNORD92  
SNORD93  
SNORD95  
SNORD96A  
SNORD98  
SNRNP27  
SNRNP35  
SNRNP48  
SNTB2  
SNTG1  
SNUPN  
SNW1

SNX12  
SNX14  
SNX15  
SNX17  
SNX2  
SNX4  
SNX6  
SOCS5  
SOCS7  
SOD1  
SON  
SP1  
SP2  
SP3  
SPACA5  
SPAG7  
SPAG9  
SPANXA2  
SPANXC  
SPANXN1  
SPANXN4  
SPAST  
SPATA19  
SPATA31A5  
SPATA31A6  
SPATS1  
SPECC1L  
SPG11  
SPG7  
SPHAR  
SPICE1  
SPIN1  
SPIN3  
SPINK9  
SPNS1  
SPOP  
SPPL3  
SPRR2B  
SPRR2C  
SPRR2E  
SPRR2G  
SPRR4  
SPRYD3  
SPSB3  
SPTLC1  
SPTLC2

SRA1  
SRF  
SRFBP1  
SRP14  
SRP72  
SRPK1  
SRPK2  
SRPRB  
SRRD  
SRRM1  
SRSF4  
SRSF8  
SRSF9  
SS18  
SS18L1  
SS18L2  
SSH1  
SSU72  
SSX7  
ST7-AS2  
ST7L  
STAG1  
STAG3L1  
STAM  
STAM2  
STAMBP  
STAP1  
STARD3  
STAT5B  
STATH  
STAU1  
STH  
STK11  
STK16  
STK19  
STK25  
STRADA  
STRAP  
STRBP  
STX17  
STX7  
STXBP3  
STXBP5  
STYX  
SUCLG2  
SUDS3



SUGP1  
SUGP2  
SULT6B1  
SUMF2  
SUMO1P1  
SUMO3  
SUN1  
SUN5  
SUPT20H  
SUPT4H1  
SUPT5H  
SUPT7L  
SYNM  
SYS1  
SZRD1  
TACC1  
TADA2A  
TAF1  
TAF1C  
TAF2  
TAF3  
TAF4  
TAF6L  
TAF7  
TAGLN2  
TANGO2  
TAP1  
TARBP2  
TASP1  
TBC1D12  
TBC1D14  
TBC1D15  
TBC1D21  
TBC1D22B  
TBC1D28  
TBC1D3P2  
TBC1D8  
TBCC  
TBCK  
TBL1XR1  
TBL2  
TBX18  
TBX3  
TCEB2  
TCEB3  
TCF20

TCF25  
TCP10  
TDG  
TDP2  
TDRD3  
TEN1  
TERF1  
TERF2  
TEX10  
TEX26  
TEX261  
TEX28  
TFAP2A  
TFAP2C  
TFCP2  
TFIP11  
TFPT  
THAP1  
THOC2  
THRAP3  
THUMPD1  
THUMPD3  
THYN1  
TIA1  
TIAL1  
TIAM1  
TIGD6  
TIMMDC1  
TINAGL1  
TIPRL  
TJP1  
TK1  
TK2  
TLK1  
TLK2  
TM2D1  
TM2D2  
TM2D3  
TM9SF4  
TMBIM4  
TMBIM6  
TMCO1  
TMCO4  
TMED10P1  
TMED4  
TMEM102

TMEM106B  
TMEM11  
TMEM110  
TMEM115  
TMEM123  
TMEM135  
TMEM161B  
TMEM164  
TMEM167A  
TMEM167B  
TMEM168  
TMEM181  
TMEM186  
TMEM192  
TMEM205  
TMEM222  
TMEM230  
TMEM244  
TMEM245  
TMEM256  
TMEM30C  
TMEM33  
TMEM39B  
TMEM41A  
TMEM43  
TMEM50A  
TMEM55A  
TMEM60  
TMEM62  
TMEM65  
TMEM68  
TMEM86B  
TMEM88B  
TMPRSS11BNL  
TMSB4Y  
TMX1  
TMX3  
TNF  
TNFRSF10A  
TNPO1  
TNPO3  
TNRC6A  
TNRC6C  
TNXB  
TOB2  
TOM1L1

TOP2B  
TOPORS  
TOR1A  
TOR1AIP1  
TOR1AIP2  
TOR1B  
TOR3A  
TOX4  
TP53  
TP53BP2  
TP53RK  
TPD52  
TPGS2  
TPI1  
TPM4  
TRA2A  
TRAF3IP1  
TRAF7  
TRAPPC10  
TRAPPC11  
TRAPPC2P1  
TRAPPC3  
TRAPPC6B  
TRAPPC8  
TRAPPC9  
TRIL  
TRIM10  
TRIM15  
TRIM2  
TRIM23  
TRIM24  
TRIM25  
TRIM26  
TRIM27  
TRIM31  
TRIM33  
TRIM34  
TRIM39  
TRIM4  
TRIM40  
TRIM52  
TRMT1  
TRMT10B  
TRMT61B  
TRNT1  
TRPM7

TRPT1  
TRUB2  
TSC2  
TSEN34  
TSG101  
TSN  
TSNAX  
TSPO  
TSPY2  
TSPY4  
TSSK2  
TTC14  
TTC23  
TTC31  
TTC37  
TTC38  
TTC39A  
TTC7A  
TTC8  
TTF1  
TTI1  
TTLL11  
TTLL4  
TTPAL  
TTY13  
TTY14  
TTY18  
TTY19  
TUBB  
TUBG2  
TUSC2  
TUT1  
TWSG1  
TXLNA  
TXNDC15  
TXNDC9  
TXNL1  
TXNL4B  
TYW1  
TYW5  
U2AF2  
UBA1  
UBA3  
UBA5  
UBA52  
UBAP2

UBD  
UBE2A  
UBE2B  
UBE2D3  
UBE2F  
UBE2G1  
UBE2J2  
UBE2K  
UBE2L3  
UBE2Q1  
UBE2R2  
UBE2V1  
UBE2Z  
UBE3A  
UBE3C  
UBE4A  
UBL5  
UBLCP1  
UBN1  
UBOX5  
UBQLN1  
UBR2  
UBR3  
UBXN2A  
UBXN2B  
UCHL3  
UCK1  
UFC1  
UFL1  
UGGT2  
UGT2A3  
UGT2B15  
UHMK1  
UIMC1  
ULK4P3  
UNC119B  
UNC50  
UNK  
UPF2  
UQCR11  
URB1  
UROS  
USE1  
USF2  
USP10  
USP12

USP14  
USP15  
USP16  
USP21  
USP25  
USP3  
USP37  
USP39  
USP42  
USP47  
USP7  
UTP23  
UTP3  
UTS2  
UVRAG  
VAMP3  
VAPB  
VARS  
VARS2  
VAV1  
VENTXP1  
VENTXP7  
VHL  
VIP  
VIPAS39  
VMP1  
VPRBP  
VPS11  
VPS13A  
VPS16  
VPS26A  
VPS28  
VPS33A  
VPS33B  
VPS35  
VPS36  
VPS37C  
VPS41  
VPS45  
VPS4B  
VPS52  
VPS72  
VPS8  
VRK2  
VSTM1  
VTRNA1-2

VWA7  
VWA9  
WAC  
WAPAL  
WARS2  
WASF2  
WBSCR16  
WDFY1  
WDR1  
WDR11  
WDR19  
WDR20  
WDR26  
WDR33  
WDR37  
WDR45B  
WDR48  
WDR55  
WDR59  
WDR70  
WDR73  
WDR82  
WDR83OS  
WDR89  
WDR92  
WDYHV1  
WFDC11  
WFDC6  
WHAMM  
WIBG  
WIZ  
WNK1  
WRAP73  
WTAP  
XAB2  
XPC  
XPNPEP1  
XPO7  
XPOT  
YAF2  
YDJC  
YIPF4  
YKT6  
YLPM1  
YME1L1  
YTHDC1



YTHDC2  
YTHDF1  
YTHDF3  
YWHAB  
YWHAG  
YY1  
YY1AP1  
ZBED4  
ZBED5  
ZBTB11  
ZBTB12  
ZBTB14  
ZBTB22  
ZBTB25  
ZBTB3  
ZBTB34  
ZBTB40  
ZBTB43  
ZBTB44  
ZBTB45  
ZBTB48  
ZBTB5  
ZBTB6  
ZBTB8A  
ZBTB9  
ZC3H11A  
ZC3H13  
ZC3H14  
ZC3H18  
ZC3H7A  
ZCCHC10  
ZCCHC3  
ZCCHC4  
ZCCHC7  
ZCCHC8  
ZDHHC17  
ZDHHC20  
ZFAND1  
ZFP1  
ZFP3  
ZFP57  
ZFP91  
ZFR  
ZFX  
ZFYVE20  
ZHX3

ZKSCAN2  
ZKSCAN4  
ZMAT2  
ZMPSTE24  
ZMYM1  
ZMYM5  
ZMYM6  
ZMYND11  
ZNF107  
ZNF12  
ZNF131  
ZNF134  
ZNF138  
ZNF140  
ZNF146  
ZNF148  
ZNF17  
ZNF174  
ZNF18  
ZNF180  
ZNF2  
ZNF202  
ZNF207  
ZNF227  
ZNF23  
ZNF230  
ZNF234  
ZNF24  
ZNF252P  
ZNF26  
ZNF260  
ZNF268  
ZNF271  
ZNF302  
ZNF304  
ZNF311  
ZNF317  
ZNF318  
ZNF320  
ZNF321P  
ZNF326  
ZNF337  
ZNF35  
ZNF350  
ZNF354A  
ZNF354B

ZNF394  
ZNF398  
ZNF410  
ZNF416  
ZNF419  
ZNF420  
ZNF428  
ZNF433  
ZNF44  
ZNF440  
ZNF445  
ZNF449  
ZNF45  
ZNF451  
ZNF461  
ZNF468  
ZNF510  
ZNF512  
ZNF512B  
ZNF518A  
ZNF529  
ZNF547  
ZNF548  
ZNF557  
ZNF561  
ZNF562  
ZNF57  
ZNF586  
ZNF594  
ZNF595  
ZNF597  
ZNF600  
ZNF613  
ZNF619  
ZNF621  
ZNF622  
ZNF624  
ZNF630  
ZNF639  
ZNF644  
ZNF664  
ZNF669  
ZNF672  
ZNF691  
ZNF692  
ZNF696

ZNF7  
ZNF700  
ZNF705G  
ZNF75A  
ZNF76  
ZNF761  
ZNF766  
ZNF780A  
ZNF780B  
ZNF782  
ZNF783  
ZNF787  
ZNF789  
ZNF800  
ZNF805  
ZNF830  
ZNF839  
ZNF92  
ZNHIT3  
ZNRD1  
ZNRF3  
ZRANB1  
ZRANB2  
ZSCAN16  
ZSCAN20  
ZSCAN22  
ZSCAN25  
ZSCAN26  
ZSCAN29  
ZSCAN32  
ZSCAN5A  
ZSCAN9  
ZSWIM5  
ZSWIM7  
ZW10  
ZXDC  
ZZEF1  
ZZZ3
